# Supplementary material for: Development of a tool for assessing the clinical competency of Chinese master’s nursing students based on the mini-CEX: a Delphi method study
Source: HighWire-hosted journal article supplement (doi:10.1136/bmjopen-2023-078719), 2024-03-01
Supplement: bmjopen-2023-078719supp001_data_supplement.pdf [file bmjopen-2023-078719supp001_data_supplement.pdf]

## **Appendix I: The first round of expert consultation questionnaire**

Dear Experts:

This study intends to build a scientific clinical competency evaluation tool for master's degree in nursing based on the Mini-CEX in medical education, taking the clinical competency of nurses as the theoretical basis, analyzing expert opinions and literature, summarizing relevant contents, and referring to the actual situation of China, so as to provide a reference for the clinical competency evaluation program of MNS. We are familiar with your rich experience in the field of postgraduate nursing education, as well as your profound knowledge. We invite you to participate in this research and look forward to your guidance, and thank you very much for your support of this study in your busy schedule!

The preliminary construction of the evaluation tool for clinical competence of nursing master degree students includes 7 dimensions (nurse-patient communication, health assessment, clinical decision-making, operational skills, health promotion, humanistic care, and organizational effectiveness) and 53 entries. Please evaluate the importance of these evaluation indexes, and your opinion will directly influence the construction of the subsequent evaluation index system! In order to ensure that this research project can be completed on time, please respond within one week!

Finally, I would like to express my gratitude to you again! I sincerely thank you for your participation in this study, and wish you good health and good work!

Part I Basic information of experts

1. Name:
2. Age(years):
3. Workplace:
4. Years of work:
5. Education:

A.Bachelor's degree    B.Master's degree    C.Doctor    D.Others: \_\_\_\_\_
6. Title:

A.Junior    B.Intermediate    C.Associate Senior    D.Positive Senior    E.Others: \_\_\_\_\_
5. Is a graduate advisor:

A.Yes ( Doctoral Supervisor/Master's degree advisor )    B.No
6. What are your current role? ( Multiple choices available )

A.Teaching    B.Clinical    C.Administration    D.Management    E.Scientific Research

Part II Consultation on Clinical Competency Evaluation Tool Indicators for Nursing Master Degree Students

Instructions:

This scale covers 7 dimensions with 53 entries. There are five different levels of importance, namely very important, relatively important, generally important, not too important, and not necessary, with scores of 5, 4, 3, 2, and 1.

If there is a need to adjust, revise, add or delete entries, you can directly modify in the "Revision" column.

Table 1 Consultation table of the clinical competence evaluation tool (scale dimensions) for nursing master's degree students

| Dimensionality                 | Importance evaluation of indicators |                |                    |                      |               | Modify or delete comments |
|--------------------------------|-------------------------------------|----------------|--------------------|----------------------|---------------|---------------------------|
|                                | Very important                      | More important | General importance | Not really important | Not important |                           |
|                                | 5                                   | 4              | 3                  | 2                    | 1             |                           |
| A Nurse-Patient Communication  |                                     |                |                    |                      |               |                           |
| B Health assessments           |                                     |                |                    |                      |               |                           |
| C Clinical Decision Making     |                                     |                |                    |                      |               |                           |
| D Operating Skills             |                                     |                |                    |                      |               |                           |
| E Health Education             |                                     |                |                    |                      |               |                           |
| F Humanistic Care              |                                     |                |                    |                      |               |                           |
| G Organizational effectiveness |                                     |                |                    |                      |               |                           |

Other suggestions:

Table 2 Consultation table of the clinical competence evaluation tool (scale entries) for nursing master's degree students

| Dimensional<br>ity                          | Items                                                                                                                                                                                                         | Importance evaluation of indicators |                       |                           |                                |                  | Modify or<br>delete<br>comments |
|---------------------------------------------|---------------------------------------------------------------------------------------------------------------------------------------------------------------------------------------------------------------|-------------------------------------|-----------------------|---------------------------|--------------------------------|------------------|---------------------------------|
|                                             |                                                                                                                                                                                                               | Very<br>importa<br>nt               | More<br>importan<br>t | General<br>importanc<br>e | Not<br>really<br>importan<br>t | Not<br>important |                                 |
|                                             |                                                                                                                                                                                                               | 5                                   | 4                     | 3                         | 2                              | 1                |                                 |
| A<br>Nurse-Patien<br>t<br>Communicat<br>ion | A1 Appropriate self-introduction and addressing the patient or family                                                                                                                                         |                                     |                       |                           |                                |                  |                                 |
|                                             | A2 Inform the patient or family of the purpose of the communication                                                                                                                                           |                                     |                       |                           |                                |                  |                                 |
|                                             | A3 Confirm the patient's or family's ability to communicate, communicate in a language that the patient or family understands, and assess the patient's or family's grasp of the information when appropriate |                                     |                       |                           |                                |                  |                                 |
|                                             | A4 Ask questions and guide the patient or family when appropriate, and ask the patient's family to provide                                                                                                    |                                     |                       |                           |                                |                  |                                 |

|                      |                                                                                      |  |  |  |  |  |  |
|----------------------|--------------------------------------------------------------------------------------|--|--|--|--|--|--|
|                      | correct and sufficient communication information when necessary                      |  |  |  |  |  |  |
|                      | A5 Respond appropriately to patients when necessary                                  |  |  |  |  |  |  |
|                      | A6 Demonstrate respect and compassion for patients                                   |  |  |  |  |  |  |
|                      | A7 Not interrupting patients or family members inappropriately                       |  |  |  |  |  |  |
|                      | A8 Use non-verbal communication when necessary to achieve good communication results |  |  |  |  |  |  |
|                      | A9 Clearly thought out, well organized, well controlled pace                         |  |  |  |  |  |  |
|                      | Supplementary indicators:                                                            |  |  |  |  |  |  |
|                      |                                                                                      |  |  |  |  |  |  |
|                      |                                                                                      |  |  |  |  |  |  |
| B Health assessments | B1 Targeted physical examination                                                     |  |  |  |  |  |  |
|                      | B2 Correct physical examination technique                                            |  |  |  |  |  |  |
|                      | B3 Comprehensive and accurate assessment                                             |  |  |  |  |  |  |
|                      | B4 Correctly assess changes in the patient's condition                               |  |  |  |  |  |  |

|                            |                                                                                    |  |  |  |  |  |  |
|----------------------------|------------------------------------------------------------------------------------|--|--|--|--|--|--|
|                            | B5 Properly assess potential risks                                                 |  |  |  |  |  |  |
|                            | B6 Identify complications                                                          |  |  |  |  |  |  |
|                            | B7 Proper use of specialty assessment tools                                        |  |  |  |  |  |  |
|                            | Supplementary indicators:                                                          |  |  |  |  |  |  |
|                            |                                                                                    |  |  |  |  |  |  |
|                            |                                                                                    |  |  |  |  |  |  |
| C Clinical Decision Making | C1 Ability to identify problems                                                    |  |  |  |  |  |  |
|                            | C2 Ability to assess current changes in the patient's condition                    |  |  |  |  |  |  |
|                            | C3 Can clarify the focus of the patient's current condition observation            |  |  |  |  |  |  |
|                            | C4 Can make recommendations for decisions regarding patient conditions             |  |  |  |  |  |  |
|                            | C5 Can provide the care needed for the patient's current condition                 |  |  |  |  |  |  |
|                            | C6 Be able to analyze the factors associated with the development of the condition |  |  |  |  |  |  |

|                    |                                                                                                                                                                                               |  |  |  |  |  |  |
|--------------------|-----------------------------------------------------------------------------------------------------------------------------------------------------------------------------------------------|--|--|--|--|--|--|
|                    | C7 Critical thinking                                                                                                                                                                          |  |  |  |  |  |  |
|                    | C8 Ability to provide feedback                                                                                                                                                                |  |  |  |  |  |  |
|                    | Supplementary indicators:                                                                                                                                                                     |  |  |  |  |  |  |
|                    |                                                                                                                                                                                               |  |  |  |  |  |  |
|                    |                                                                                                                                                                                               |  |  |  |  |  |  |
| D Operating Skills | D1 Strictly implement the principle of aseptic operation in operation                                                                                                                         |  |  |  |  |  |  |
|                    | D2 Follow the requirements of the core system of checking and identification of patients and the correct timing and method of checking medical prescriptions and medications during operation |  |  |  |  |  |  |
|                    | D3 Appropriate assessment of the patient and appropriate assistance when the patient is unable to cooperate with the operation                                                                |  |  |  |  |  |  |
|                    | D4 Perform the steps according to the needs of the disease and in a rational order                                                                                                            |  |  |  |  |  |  |
|                    | D5 Accurate operation process                                                                                                                                                                 |  |  |  |  |  |  |

|                    |                                                                        |  |  |  |  |  |  |
|--------------------|------------------------------------------------------------------------|--|--|--|--|--|--|
|                    | D6 Respond appropriately to patient discomfort caused during operation |  |  |  |  |  |  |
|                    | D7 Pay attention to patient privacy protection during operation        |  |  |  |  |  |  |
|                    | D8 Correct final disposal at the end of the operation                  |  |  |  |  |  |  |
|                    | Supplementary indicators:                                              |  |  |  |  |  |  |
|                    |                                                                        |  |  |  |  |  |  |
|                    |                                                                        |  |  |  |  |  |  |
|                    |                                                                        |  |  |  |  |  |  |
| E Health Education | E1 To inform the purpose of health promotion                           |  |  |  |  |  |  |
|                    | E2Provide the appropriate health education knowledge needed            |  |  |  |  |  |  |
|                    | E3 Health promotion using easy-to-understand language                  |  |  |  |  |  |  |
|                    | E4 Demonstrate and explain to patients when necessary                  |  |  |  |  |  |  |
|                    | E5 Accurate mission content                                            |  |  |  |  |  |  |

|                         |                                                                             |  |  |  |  |  |  |
|-------------------------|-----------------------------------------------------------------------------|--|--|--|--|--|--|
|                         | E6 Identify patients with missionary knowledge                              |  |  |  |  |  |  |
|                         | Supplementary indicators:                                                   |  |  |  |  |  |  |
|                         |                                                                             |  |  |  |  |  |  |
|                         |                                                                             |  |  |  |  |  |  |
| F<br>Humanistic<br>Care | F1 Ability to build a good trusting relationship with patients              |  |  |  |  |  |  |
|                         | F2 Facing patients with a professional attitude and identity                |  |  |  |  |  |  |
|                         | F3 Able to notice and deal with patient discomfort in a timely manner       |  |  |  |  |  |  |
|                         | F4 Ensure patient safety and protect patients when necessary                |  |  |  |  |  |  |
|                         | F5 Respect the patient's wishes where possible                              |  |  |  |  |  |  |
|                         | F6 Good attitude and firm and polite tone when you need to refuse a patient |  |  |  |  |  |  |
|                         | F7 Protecting patient privacy                                               |  |  |  |  |  |  |
|                         | F8 Empathy for patients                                                     |  |  |  |  |  |  |

|                                      |                                                                                          |  |  |  |  |  |  |
|--------------------------------------|------------------------------------------------------------------------------------------|--|--|--|--|--|--|
|                                      | F9 Can use appropriate methods to help patients build confidence to overcome the disease |  |  |  |  |  |  |
|                                      | Supplementary indicators:                                                                |  |  |  |  |  |  |
|                                      |                                                                                          |  |  |  |  |  |  |
|                                      |                                                                                          |  |  |  |  |  |  |
| G<br>Organizational<br>effectiveness | G1 Ability to respond effectively to emergencies                                         |  |  |  |  |  |  |
|                                      | G2 Proper time control and overall efficiency                                            |  |  |  |  |  |  |
|                                      | G3 Focus on prioritization in nursing behaviors                                          |  |  |  |  |  |  |
|                                      | G4 Efficient use of resources to provide optimal service                                 |  |  |  |  |  |  |
|                                      | G5 Appropriate and flexible assessment processing                                        |  |  |  |  |  |  |
|                                      | G6 High patient satisfaction                                                             |  |  |  |  |  |  |
|                                      | Supplementary indicators:                                                                |  |  |  |  |  |  |
|                                      |                                                                                          |  |  |  |  |  |  |
|                                      |                                                                                          |  |  |  |  |  |  |

Part III Expert familiarity with consulting content

Note: The degree of familiarity mainly includes very familiar, relatively familiar, generally familiar, not too familiar and unfamiliar, please refer to your own actual situation to fill in the corresponding column "√".

| Dimensionality                 | Level of familiarity |                     |                    |                  |            |
|--------------------------------|----------------------|---------------------|--------------------|------------------|------------|
|                                | Very familiar        | Relatively familiar | Generally familiar | Not too familiar | Unfamiliar |
| A Nurse-Patient Communication  |                      |                     |                    |                  |            |
| B Health assessments           |                      |                     |                    |                  |            |
| C Clinical Decision Making     |                      |                     |                    |                  |            |
| D Operating Skills             |                      |                     |                    |                  |            |
| E Health Education             |                      |                     |                    |                  |            |
| F Humanistic Care              |                      |                     |                    |                  |            |
| G Organizational effectiveness |                      |                     |                    |                  |            |

Part IV The expert's judgment on the basis of consulting content

Note: Judgment is based on five aspects: intuition, theoretical knowledge and practical experience, etc. Please make your choice with reference to your own actual situation and put a tick in the corresponding column.

| Basis of judgement   | Degree of impact |        |        |
|----------------------|------------------|--------|--------|
|                      | Great            | Medium | Little |
| Theoretical analysis |                  |        |        |
| Practical experience |                  |        |        |
| Bibliography         |                  |        |        |
| Subjective judgement |                  |        |        |

## **Appendix II: The second round of expert consultation questionnaire**

Dear Experts,

This study intends to build a clinical competency evaluation tool for nursing master degree students based on the Mini-CEX in medical education, taking the clinical competency of nurses as the theoretical basis, through literature review and expert opinions, and aiming to provide reference for further standardization of the clinical competency evaluation tool for nursing master degree students. We are familiar with your rich knowledge and experience in the field of nursing graduate education, so we sincerely invite you to help and guide us to complete the consultation, and thank you very much for your support to this study in your busy schedule!

The clinical competence evaluation tool for nursing master degree students constructed by this project after the first round of correspondence includes 7 dimensions (nurse-patient communication, health assessment, clinical decision-making, operational skills, health promotion, humanistic care, and organizational effectiveness) and 52 entries. Please rate the importance of these evaluation entries. Please start to evaluate the importance of these evaluation indexes, and your opinion will directly influence the construction of the subsequent evaluation index system! In order to ensure that this research project can be completed on time, please reply within a week, and we sincerely thank you for your help and guidance!

Finally, I would like to express my gratitude to you again! I sincerely thank you for your participation in this study, and wish you good health and good work!

### **Part I Consultation on Clinical Competency Evaluation Tool Indicators for Nursing Master Degree Students**

Instructions:

This scale covers 7 dimensions with 53 entries. There are five different levels of importance, namely very important, relatively important, generally important, not too important, and not necessary, with scores of 5, 4, 3, 2, and 1.

If there is a need to adjust, revise, add or delete entries, you can directly modify in the "Revision" column.

Table 1 Consultation table of the clinical competence evaluation tool (scale dimensions) for nursing master's degree students

| Dimensionality                 | Importance evaluation of indicators |                |                    |                      |               | Modify or delete comments |
|--------------------------------|-------------------------------------|----------------|--------------------|----------------------|---------------|---------------------------|
|                                | Very important                      | More important | General importance | Not really important | Not important |                           |
|                                | 5                                   | 4              | 3                  | 2                    | 1             |                           |
| A Nurse-Patient Communication  |                                     |                |                    |                      |               |                           |
| B Health assessments           |                                     |                |                    |                      |               |                           |
| C Clinical Decision Making     |                                     |                |                    |                      |               |                           |
| D Operating Skills             |                                     |                |                    |                      |               |                           |
| E Health Education             |                                     |                |                    |                      |               |                           |
| F Humanistic Care              |                                     |                |                    |                      |               |                           |
| G Organizational effectiveness |                                     |                |                    |                      |               |                           |
| Other suggestions:             |                                     |                |                    |                      |               |                           |

Table 2 Consultation table of the clinical competence evaluation tool (scale entries) for nursing master's degree students

| Dimensionality                | Items                                                                                                                                                                                                         | Importance evaluation of indicators |                |                    |                      |               | Modify or delete comments |
|-------------------------------|---------------------------------------------------------------------------------------------------------------------------------------------------------------------------------------------------------------|-------------------------------------|----------------|--------------------|----------------------|---------------|---------------------------|
|                               |                                                                                                                                                                                                               | Very important                      | More important | General importance | Not really important | Not important |                           |
|                               |                                                                                                                                                                                                               | 5                                   | 4              | 3                  | 2                    | 1             |                           |
| A Nurse-Patient Communication | A1 Appropriate self-introduction and addressing the patient or family                                                                                                                                         |                                     |                |                    |                      |               |                           |
|                               | A2 Inform the patient or family of the purpose of the communication                                                                                                                                           |                                     |                |                    |                      |               |                           |
|                               | A3 Confirm the patient's or family's ability to communicate, communicate in a language that the patient or family understands, and assess the patient's or family's grasp of the information when appropriate |                                     |                |                    |                      |               |                           |
|                               | A4 Ask questions and guide the patient or family when appropriate, and ask the patient's family to provide correct and sufficient communication                                                               |                                     |                |                    |                      |               |                           |

|                      |                                                                                      |  |  |  |  |  |  |
|----------------------|--------------------------------------------------------------------------------------|--|--|--|--|--|--|
|                      | information when necessary                                                           |  |  |  |  |  |  |
|                      | A5 Respond appropriately to patients when necessary                                  |  |  |  |  |  |  |
|                      | A6 Demonstrate respect and compassion for patients                                   |  |  |  |  |  |  |
|                      | A7 Not interrupting patients or family members inappropriately                       |  |  |  |  |  |  |
|                      | A8 Use non-verbal communication when necessary to achieve good communication results |  |  |  |  |  |  |
|                      | A9 Clearly thought out, well organized, well controlled pace                         |  |  |  |  |  |  |
|                      | Supplementary indicators:                                                            |  |  |  |  |  |  |
|                      |                                                                                      |  |  |  |  |  |  |
|                      |                                                                                      |  |  |  |  |  |  |
| B Health assessments | B1 Targeted physical examination                                                     |  |  |  |  |  |  |
|                      | B2 Correct physical examination technique                                            |  |  |  |  |  |  |
|                      | B3 Comprehensive and accurate assessment                                             |  |  |  |  |  |  |

|                                  |                                                                         |  |  |  |  |  |  |
|----------------------------------|-------------------------------------------------------------------------|--|--|--|--|--|--|
|                                  | B4 Correct assessment of the patient's condition                        |  |  |  |  |  |  |
|                                  | B5 Properly assess potential risks                                      |  |  |  |  |  |  |
|                                  | B6 Identifying complications                                            |  |  |  |  |  |  |
|                                  | B7 Proper use of specialty assessment tools                             |  |  |  |  |  |  |
|                                  | Supplementary indicators:                                               |  |  |  |  |  |  |
|                                  |                                                                         |  |  |  |  |  |  |
|                                  |                                                                         |  |  |  |  |  |  |
| C Clinical<br>Decision<br>Making | C1 Ability to identify clinical problems                                |  |  |  |  |  |  |
|                                  | C2 Ability to assess current changes in the patient's condition         |  |  |  |  |  |  |
|                                  | C3 Can clarify the focus of the patient's current condition observation |  |  |  |  |  |  |
|                                  | C4 Can make recommendations for decisions regarding patient conditions  |  |  |  |  |  |  |
|                                  | C5 Can provide the care needed for the patient's current condition      |  |  |  |  |  |  |
|                                  | C6 Can analyze the factors and causes associated                        |  |  |  |  |  |  |

|                    |                                                                                                                                                                                               |  |  |  |  |  |  |
|--------------------|-----------------------------------------------------------------------------------------------------------------------------------------------------------------------------------------------|--|--|--|--|--|--|
|                    | with the development of the condition                                                                                                                                                         |  |  |  |  |  |  |
|                    | C7 Think critically                                                                                                                                                                           |  |  |  |  |  |  |
|                    | C8 Ability to provide feedback                                                                                                                                                                |  |  |  |  |  |  |
|                    | Supplementary indicators:                                                                                                                                                                     |  |  |  |  |  |  |
|                    |                                                                                                                                                                                               |  |  |  |  |  |  |
|                    |                                                                                                                                                                                               |  |  |  |  |  |  |
| D Operating Skills | D1 Aseptic operation strictly implement the principles of aseptic operation                                                                                                                   |  |  |  |  |  |  |
|                    | D2 Follow the requirements of the core system of checking and identification of patients and the correct timing and method of checking medical prescriptions and medications during operation |  |  |  |  |  |  |
|                    | D3 Provide appropriate assistance when the patient is unable to cooperate with the operation                                                                                                  |  |  |  |  |  |  |
|                    | D4 Perform the steps in a reasonable order according to the needs of the disease                                                                                                              |  |  |  |  |  |  |
|                    | D5 Accurate operation process                                                                                                                                                                 |  |  |  |  |  |  |

|                    |                                                                        |  |  |  |  |  |  |
|--------------------|------------------------------------------------------------------------|--|--|--|--|--|--|
|                    | D6 Respond appropriately to patient discomfort caused during operation |  |  |  |  |  |  |
|                    | D7 Correct final disposal at the end of the operation                  |  |  |  |  |  |  |
|                    | Supplementary indicators:                                              |  |  |  |  |  |  |
|                    |                                                                        |  |  |  |  |  |  |
|                    |                                                                        |  |  |  |  |  |  |
|                    |                                                                        |  |  |  |  |  |  |
|                    |                                                                        |  |  |  |  |  |  |
| E Health Education | E1 To inform the purpose of health promotion                           |  |  |  |  |  |  |
|                    | E2Provide the appropriate health education knowledge needed            |  |  |  |  |  |  |
|                    | E3 Health promotion using easy-to-understand language                  |  |  |  |  |  |  |
|                    | E4 Demonstrate and explain to patients when necessary                  |  |  |  |  |  |  |
|                    | E5 Accurate mission content                                            |  |  |  |  |  |  |

|                      |                                                                                                             |  |  |  |  |  |  |
|----------------------|-------------------------------------------------------------------------------------------------------------|--|--|--|--|--|--|
|                      | E6 Identify patients with missionary knowledge                                                              |  |  |  |  |  |  |
|                      | Supplementary indicators:                                                                                   |  |  |  |  |  |  |
|                      |                                                                                                             |  |  |  |  |  |  |
|                      |                                                                                                             |  |  |  |  |  |  |
| F Humanistic<br>Care | F1 Ability to build a good trusting relationship with patients                                              |  |  |  |  |  |  |
|                      | F2 Facing patients with a professional attitude and identity                                                |  |  |  |  |  |  |
|                      | F3 Able to notice and deal with patient discomfort in a timely manner                                       |  |  |  |  |  |  |
|                      | F4 Ensuring patient safety                                                                                  |  |  |  |  |  |  |
|                      | F5 Respect the patient's wishes where possible                                                              |  |  |  |  |  |  |
|                      | F6 To ensure patient safety, be firm and polite when you need to refuse unreasonable requests from patients |  |  |  |  |  |  |
|                      | F7 Protecting patient privacy                                                                               |  |  |  |  |  |  |
|                      | F8 Empathy for patients                                                                                     |  |  |  |  |  |  |

|                                   |                                                                                                     |  |  |  |  |  |  |
|-----------------------------------|-----------------------------------------------------------------------------------------------------|--|--|--|--|--|--|
|                                   | F9 Can use appropriate methods to help patients increase their confidence in overcoming the disease |  |  |  |  |  |  |
|                                   | Supplementary indicators:                                                                           |  |  |  |  |  |  |
|                                   |                                                                                                     |  |  |  |  |  |  |
|                                   |                                                                                                     |  |  |  |  |  |  |
| G<br>Organizational effectiveness | G1 Ability to respond effectively to emergencies                                                    |  |  |  |  |  |  |
|                                   | G2 Proper time control and overall efficiency                                                       |  |  |  |  |  |  |
|                                   | G3 Focus on prioritization in nursing behaviors                                                     |  |  |  |  |  |  |
|                                   | G4 Efficient use of resources to provide optimal service                                            |  |  |  |  |  |  |
|                                   | G5 Appropriate and flexible assessment processing                                                   |  |  |  |  |  |  |
|                                   | G6 High patient satisfaction                                                                        |  |  |  |  |  |  |
|                                   | Supplementary indicators:                                                                           |  |  |  |  |  |  |
|                                   |                                                                                                     |  |  |  |  |  |  |
|                                   |                                                                                                     |  |  |  |  |  |  |

Part II Expert familiarity with consulting content

Note: The degree of familiarity mainly includes very familiar, relatively familiar, generally familiar, not too familiar and unfamiliar, please refer to your own actual situation to fill in the corresponding column "√".

| Dimensionality                 | Level of familiarity |                     |                    |                  |            |
|--------------------------------|----------------------|---------------------|--------------------|------------------|------------|
|                                | Very familiar        | Relatively familiar | Generally familiar | Not too familiar | Unfamiliar |
| A Nurse-Patient Communication  |                      |                     |                    |                  |            |
| B Health assessments           |                      |                     |                    |                  |            |
| C Clinical Decision Making     |                      |                     |                    |                  |            |
| D Operating Skills             |                      |                     |                    |                  |            |
| E Health Education             |                      |                     |                    |                  |            |
| F Humanistic Care              |                      |                     |                    |                  |            |
| G Organizational effectiveness |                      |                     |                    |                  |            |

Part III The expert's judgment on the basis of consulting content

Note: Judgment is based on five aspects: intuition, theoretical knowledge and practical experience, etc. Please make your choice with reference to your own actual situation and put a tick in the corresponding column.

| Basis of judgement   | Degree of impact |        |        |
|----------------------|------------------|--------|--------|
|                      | Great            | Medium | Little |
| Theoretical analysis |                  |        |        |
| Practical experience |                  |        |        |
| Bibliography         |                  |        |        |
| Subjective judgement |                  |        |        |

Appendix III MNS Graduate Student Clinical Competency Evaluation Index

| Nurse-Patient Communication (9 items):                                                                                                                                                                        | Health Assessment (7 items):                     | Clinical Decision Making (8 items)                                      |
|---------------------------------------------------------------------------------------------------------------------------------------------------------------------------------------------------------------|--------------------------------------------------|-------------------------------------------------------------------------|
| A1 Appropriate self-introduction and addressing the patient or family                                                                                                                                         | B1 Targeted physical examination                 | C1 Ability to identify clinical problems                                |
| A2 Inform the patient or family of the purpose of the communication                                                                                                                                           | B2 Correct physical examination technique        | C2 Ability to assess current changes in the patient's condition         |
| A3 Confirm the patient's or family's ability to communicate, communicate in a language that the patient or family understands, and assess the patient's or family's grasp of the information when appropriate | B3 Comprehensive and accurate assessment         | C3 Can clarify the focus of the patient's current condition observation |
| A4 Ask questions and guide the patient or family when appropriate, and ask the patient's family to provide correct and sufficient communication information when necessary                                    | B4 Correct assessment of the patient's condition | C4 Can make recommendations for decisions regarding patient conditions  |
| A5 Responding appropriately to patients                                                                                                                                                                       | B5 Properly assess potential risks               | C5 Can provide the care needed for the                                  |

|                                                                                                                                        |                                                              |                                                                                        |
|----------------------------------------------------------------------------------------------------------------------------------------|--------------------------------------------------------------|----------------------------------------------------------------------------------------|
|                                                                                                                                        |                                                              | patient's current condition                                                            |
| A6 Demonstrate respect and compassion for patients                                                                                     | B6 Identify complications                                    | C6 Can analyze the factors and causes associated with the development of the condition |
| A7 Not interrupting patients or family members inappropriately                                                                         | B7 Proper use of specialty assessment tools                  | C7 Critical thinking                                                                   |
| A8 Use non-verbal communication when necessary to achieve good communication results                                                   |                                                              | C8 Ability to provide feedback                                                         |
| A9 Clearly thought out, well organized, well controlled pace                                                                           |                                                              |                                                                                        |
| <b>Operating Skills (7 items):</b>                                                                                                     | <b>Health Education (6 items):</b>                           | <b>Humanistic Care (9 items):</b>                                                      |
| D1 Aseptic operation strictly implement the principles of aseptic operation                                                            | E1 To inform the purpose of health promotion                 | F1 Ability to build a good trusting relationship with patients                         |
| D2 Follow the requirements of the core system of checking and identification of patients and the correct timing and method of checking | E2 Provide the appropriate health education knowledge needed | F2 Facing patients with a professional attitude and identity                           |

|                                                                                              |                                                       |                                                                                                             |
|----------------------------------------------------------------------------------------------|-------------------------------------------------------|-------------------------------------------------------------------------------------------------------------|
| medical prescriptions and medications during operation                                       |                                                       |                                                                                                             |
| D3 Provide appropriate assistance when the patient is unable to cooperate with the operation | E3 Health promotion using easy-to-understand language | F3 Able to notice and deal with patient discomfort in a timely manner                                       |
| D4 Perform the steps in a reasonable order according to the needs of the disease             | E4 Demonstrate and explain to patients when necessary | F4 Ensure patient safety                                                                                    |
| D5 Accurate operation process                                                                | E5 Accurate mission content                           | F5 Respect for patient wishes                                                                               |
| D6 Respond appropriately to patient discomfort caused during operation                       | E6 Identify patients with missionary knowledge        | F6 To ensure patient safety, be firm and polite when you need to refuse unreasonable requests from patients |
| D7 Correct final disposal at the end of the operation                                        |                                                       | F7 Protecting patient privacy                                                                               |
|                                                                                              |                                                       | F8 Empathy for patients                                                                                     |
|                                                                                              |                                                       | F9 Can use appropriate methods to help patients increase their confidence in overcoming the disease         |

| Organizational effectiveness (6 items):                  |                                                   |                                                 |
|----------------------------------------------------------|---------------------------------------------------|-------------------------------------------------|
| G1 Ability to respond effectively to emergencies         | G2 Proper time control and overall efficiency     | G3 Focus on prioritization in nursing behaviors |
| G4 Efficient use of resources to provide optimal service | G5 Appropriate and flexible assessment processing | G6 High level of patient satisfaction           |

Appendix S1 Quantitative table of experts' familiarity with indicators

| Familiarity level              | Very familiar | More familiar | General familiarity | Less familiar | Not familiar |
|--------------------------------|---------------|---------------|---------------------|---------------|--------------|
| Quantified values              | 1             | 0.8           | 0.6                 | 0.4           | 0.2          |
| A Nurse-Patient Communication  | 14            | 2             | 0                   | 0             | 0            |
| B Health assessments           | 8             | 8             | 0                   | 0             | 0            |
| C Clinical Decision Making     | 7             | 7             | 2                   | 0             | 0            |
| D Operating Skills             | 13            | 3             | 0                   | 0             | 0            |
| E Health Education             | 14            | 2             | 0                   | 0             | 0            |
| F Humanistic Care              | 8             | 8             | 0                   | 0             | 0            |
| G Organizational effectiveness | 7             | 4             | 4                   | 1             | 0            |

Appendix S2 Quantification of the basis of expert judgment on indicators

| Basis of judgement   | Degree of impact |        |        |
|----------------------|------------------|--------|--------|
|                      | Great            | Medium | Little |
| Theoretical analysis | 13               | 3      | 0      |
| Practical experience | 13               | 1      | 2      |
| Bibliography         | 2                | 9      | 5      |

|                      |   |   |    |
|----------------------|---|---|----|
| Subjective judgement | 0 | 6 | 10 |
|----------------------|---|---|----|

Appendix S3 Results of the first round of expert correspondence

| Items                                                                                                                                                                                                         | Mean | Full Score | Coefficients of |
|---------------------------------------------------------------------------------------------------------------------------------------------------------------------------------------------------------------|------|------------|-----------------|
|                                                                                                                                                                                                               |      | Ratio      | variation       |
| Domain A: nurse-patient communication                                                                                                                                                                         | 4.8  | 81.3%      | 8.4%            |
| A1 Appropriate self-introduction and addressing the patient or family                                                                                                                                         | 4.9  | 87.5%      | 7.0%            |
| A2 Inform the patient or family of the purpose of the communication                                                                                                                                           | 4.6  | 68.8%      | 13.4%           |
| A3 Confirm the patient's or family's ability to communicate, communicate in a language that the patient or family understands, and assess the patient's or family's grasp of the information when appropriate | 5.0  | 100.0%     | 0.0%            |
| A4 Ask questions and guide the patient or family when appropriate, and ask the patient's family to provide correct and sufficient communication information when necessary                                    | 4.9  | 93.8%      | 5.1%            |
| A5 Respond appropriately to patients when necessary                                                                                                                                                           | 4.6  | 62.5%      | 13.8%           |
| A6 Demonstrate respect and compassion for patients                                                                                                                                                            | 4.8  | 81.3%      | 8.4%            |
| A7 Not interrupting patients or family members inappropriately                                                                                                                                                | 4.5  | 56.3%      | 14.1%           |
| A8 Use non-verbal communication when necessary to achieve good communication results                                                                                                                          | 4.8  | 81.3%      | 12.2%           |

|                                                                         |     |        |       |
|-------------------------------------------------------------------------|-----|--------|-------|
| A9 Clearly thought out, well organized, well controlled pace            | 4.8 | 87.5%  | 11.3% |
| Domain B: health assessments                                            | 4.9 | 87.5%  | 7.0%  |
| B1 Targeted physical examination                                        | 4.9 | 87.5%  | 7.0%  |
| B2 Correct physical examination technique                               | 4.6 | 68.8%  | 13.4% |
| B3 Comprehensive and accurate assessment                                | 4.8 | 81.3%  | 8.4%  |
| B4 Correctly assess changes in the patient's condition                  | 5.0 | 100.0% | 0.0%  |
| B5 Properly assess potential risks                                      | 5.0 | 100.0% | 0.0%  |
| B6 Identify complications                                               | 4.7 | 68.8%  | 10.2% |
| B7 Proper use of specialty assessment tools                             | 4.9 | 87.5%  | 7.0%  |
| Domain C: clinical decision making                                      | 4.9 | 87.5%  | 7.0%  |
| C1 Ability to identify problems                                         | 4.9 | 87.5%  | 7.0%  |
| C2 Ability to assess current changes in the patient's condition         | 4.9 | 93.8%  | 5.1%  |
| C3 Can clarify the focus of the patient's current condition observation | 5.0 | 100.0% | 0.0%  |
| C4 Can make recommendations for decisions regarding patient conditions  | 4.9 | 93.8%  | 5.1%  |
| C5 Can provide the care needed for the patient's current condition      | 4.9 | 87.5%  | 7.0%  |

|                                                                                                                                                                                               |     |        |       |
|-----------------------------------------------------------------------------------------------------------------------------------------------------------------------------------------------|-----|--------|-------|
| C6 Be able to analyze the factors associated with the development of the condition                                                                                                            | 4.7 | 68.8%  | 10.2% |
| C7 Critical thinking                                                                                                                                                                          | 4.8 | 75.0%  | 9.4%  |
| C8 Ability to provide feedback                                                                                                                                                                | 4.6 | 62.5%  | 13.8% |
| Domain D: operating skills                                                                                                                                                                    | 4.7 | 75.0%  | 12.8% |
| D1 Strictly implement the principle of aseptic operation in operation                                                                                                                         | 5.0 | 100.0% | 0.0%  |
| D2 Follow the requirements of the core system of checking and identification of patients and the correct timing and method of checking medical prescriptions and medications during operation | 5.0 | 100.0% | 0.0%  |
| D3 Appropriate assessment of the patient and appropriate assistance when the patient is unable to cooperate with the operation                                                                | 4.6 | 62.5%  | 13.8% |
| D4 Perform the steps according to the needs of the disease and in a rational order                                                                                                            | 4.8 | 75.0%  | 9.4%  |
| D5 Accurate operation process                                                                                                                                                                 | 4.7 | 75.0%  | 12.8% |
| D6 Respond appropriately to patient discomfort caused during operation                                                                                                                        | 4.7 | 68.8%  | 10.2% |
| D7 Pay attention to patient privacy protection during operation                                                                                                                               | 4.8 | 81.3%  | 8.4%  |
| D8 Correct final disposal at the end of the operation                                                                                                                                         | 4.8 | 81.3%  | 8.4%  |

|                                                                             |     |       |        |
|-----------------------------------------------------------------------------|-----|-------|--------|
| Domain E: health education                                                  | 4.9 | 87.5% | 7.0%   |
| E1 To inform the purpose of health promotion                                | 4.6 | 68.8% | 13.4%  |
| E2 Provide the appropriate health education knowledge needed                | 4.9 | 93.8% | 5.1%   |
| E3 Health promotion using easy-to-understand language                       | 4.8 | 81.3% | 8.4%   |
| E4 Demonstrate and explain to patients when necessary                       | 4.8 | 75.0% | 9.4%   |
| E5 Accurate mission content                                                 | 4.9 | 93.8% | 5.1%   |
| E6 Identify patients with missionary knowledge                              | 4.8 | 87.5% | 11.3%  |
| Domain F: humanistic care                                                   | 4.8 | 81.3% | 8.4%   |
| F1 Ability to build a good trusting relationship with patients              | 4.5 | 56.3% | 14.1%  |
| F2 Facing patients with a professional attitude and identity                | 4.7 | 75.0% | 12.8%  |
| F3 Able to notice and deal with patient discomfort in a timely manner       | 4.9 | 93.8% | 5.1%   |
| F4 Ensure patient safety and protect patients when necessary                | 4.9 | 93.8% | 10.3%  |
| F5 Respect the patient's wishes where possible                              | 4.6 | 68.8% | 13.4%  |
| F6 Good attitude and firm and polite tone when you need to refuse a patient | 4.0 | 37.5% | 25.8%* |
| F7 Protecting patient privacy                                               | 4.7 | 68.8% | 10.2%  |
| F8 Empathy for patients                                                     | 4.8 | 81.3% | 8.4%   |

|                                                                                          |     |       |       |
|------------------------------------------------------------------------------------------|-----|-------|-------|
| F9 Can use appropriate methods to help patients build confidence to overcome the disease | 4.7 | 68.8% | 10.2% |
| Domian G: organizational effectiveness                                                   | 4.6 | 68.8% | 15.9% |
| G1 Ability to respond effectively to emergencies                                         | 4.8 | 75.0% | 9.4%  |
| G2 Proper time control and overall efficiency                                            | 4.7 | 75.0% | 12.8% |
| G3 Focus on prioritization in nursing behaviors                                          | 4.8 | 75.0% | 9.4%  |
| G4 Efficient use of resources to provide optimal service                                 | 4.6 | 68.8% | 13.4% |
| G5 Appropriate and flexible assessment processing                                        | 4.6 | 75.0% | 15.5% |
| G6 High patient satisfaction                                                             | 4.6 | 75.0% | 15.5% |

Appendix S4 Results of the second round of expert correspondence

| Items                                                                 | Mean | Full Score | Coefficients of |
|-----------------------------------------------------------------------|------|------------|-----------------|
|                                                                       |      | Ratio      | variation       |
| Domain A: nurse-patient communication                                 | 4.8  | 75.0%      | 9.4%            |
| A1 Appropriate self-introduction and addressing the patient or family | 4.8  | 81.3%      | 8.4%            |
| A2 Inform the patient or family of the purpose of the communication   | 4.8  | 87.5%      | 11.3%           |

|                                                                                                                                                                                                               |     |        |       |
|---------------------------------------------------------------------------------------------------------------------------------------------------------------------------------------------------------------|-----|--------|-------|
| A3 Confirm the patient's or family's ability to communicate, communicate in a language that the patient or family understands, and assess the patient's or family's grasp of the information when appropriate | 4.9 | 93.8%  | 5.1%  |
| A4 Ask questions and guide the patient or family when appropriate, and ask the patient's family to provide correct and sufficient communication information when necessary                                    | 4.8 | 81.3%  | 8.4%  |
| A5 Respond appropriately to patients when necessary                                                                                                                                                           | 4.4 | 56.3%  | 18.3% |
| A6 Demonstrate respect and compassion for patients                                                                                                                                                            | 4.6 | 62.5%  | 10.8% |
| A7 Not interrupting patients or family members inappropriately                                                                                                                                                | 4.5 | 56.3%  | 14.1% |
| A8 Use non-verbal communication when necessary to achieve good communication results                                                                                                                          | 4.5 | 62.5%  | 16.2% |
| A9 Clearly thought out, well organized, well controlled pace                                                                                                                                                  | 5.0 | 100.0% | 0.0%  |
| Domain B: health assessments                                                                                                                                                                                  | 4.9 | 93.8%  | 5.1%  |
| B1 Targeted physical examination                                                                                                                                                                              | 4.8 | 81.3%  | 12.2% |
| B2 Correct physical examination technique                                                                                                                                                                     | 4.9 | 87.5%  | 7.0%  |
| B3 Comprehensive and accurate assessment                                                                                                                                                                      | 4.8 | 81.3%  | 8.4%  |
| B4 Correct assessment of the patient's condition                                                                                                                                                              | 5.0 | 100.0% | 0.0%  |

|                                                                                        |     |        |       |
|----------------------------------------------------------------------------------------|-----|--------|-------|
| B5 Properly assess potential risks                                                     | 5.0 | 100.0% | 0.0%  |
| B6 Identifying complications                                                           | 4.8 | 75.0%  | 9.4%  |
| B7 Proper use of specialty assessment tools                                            | 4.8 | 81.3%  | 8.4%  |
| Domain C: clinical decision making                                                     | 4.9 | 93.8%  | 5.1%  |
| C1 Ability to identify clinical problems                                               | 4.9 | 87.5%  | 7.0%  |
| C2 Ability to assess current changes in the patient's condition                        | 4.8 | 81.3%  | 8.4%  |
| C3 Can clarify the focus of the patient's current condition observation                | 5.0 | 100.0% | 0.0%  |
| C4 Can make recommendations for decisions regarding patient conditions                 | 4.5 | 50.0%  | 11.5% |
| C5 Can provide the care needed for the patient's current condition                     | 4.8 | 81.3%  | 8.4%  |
| C6 Can analyze the factors and causes associated with the development of the condition | 4.6 | 62.5%  | 10.8% |
| C7 Think critically                                                                    | 4.9 | 87.5%  | 7.0%  |
| C8 Ability to provide feedback                                                         | 4.8 | 75.0%  | 9.4%  |
| Domian D: operating skills                                                             | 4.6 | 68.8%  | 13.4% |
| D1 Aseptic operation strictly implement the principles of aseptic operation            | 4.9 | 93.8%  | 5.1%  |

|                                                                                                                                                                                               |     |        |       |
|-----------------------------------------------------------------------------------------------------------------------------------------------------------------------------------------------|-----|--------|-------|
| D2 Follow the requirements of the core system of checking and identification of patients and the correct timing and method of checking medical prescriptions and medications during operation | 4.9 | 93.8%  | 5.1%  |
| D3 Provide appropriate assistance when the patient is unable to cooperate with the operation                                                                                                  | 4.7 | 68.8%  | 10.2% |
| D4 Perform the steps in a reasonable order according to the needs of the disease                                                                                                              | 4.9 | 87.5%  | 7.0%  |
| D5 Accurate operation process                                                                                                                                                                 | 4.6 | 68.8%  | 13.4% |
| D6 Respond appropriately to patient discomfort caused during operation                                                                                                                        | 4.8 | 75.0%  | 9.4%  |
| D7 Correct final disposal at the end of the operation                                                                                                                                         | 4.8 | 75.0%  | 9.4%  |
| Domian E: health education                                                                                                                                                                    | 4.9 | 87.5%  | 7.0%  |
| E1 To inform the purpose of health promotion                                                                                                                                                  | 4.8 | 81.3%  | 8.4%  |
| E2 Provide the appropriate health education knowledge needed                                                                                                                                  | 5.0 | 100.0% | 0.0%  |
| E3 Health promotion using easy-to-understand language                                                                                                                                         | 4.8 | 81.3%  | 8.4%  |
| E4 Demonstrate and explain to patients when necessary                                                                                                                                         | 4.8 | 81.3%  | 8.4%  |
| E5 Accurate mission content                                                                                                                                                                   | 4.9 | 93.8%  | 5.1%  |
| E6 Identify patients with missionary knowledge                                                                                                                                                | 4.6 | 68.8%  | 13.4% |

|                                                                                                             |     |       |       |
|-------------------------------------------------------------------------------------------------------------|-----|-------|-------|
| Domian F: humanistic care                                                                                   | 4.9 | 87.5% | 7.0%  |
| F1 Ability to build a good trusting relationship with patients                                              | 4.8 | 75.0% | 9.4%  |
| F2 Facing patients with a professional attitude and identity                                                | 4.9 | 87.5% | 7.0%  |
| F3 Able to notice and deal with patient discomfort in a timely manner                                       | 4.8 | 81.3% | 8.4%  |
| F4 Ensure patient safety                                                                                    | 4.9 | 93.8% | 5.1%  |
| F5 Respect the patient's wishes where possible                                                              | 4.6 | 62.5% | 10.8% |
| F6 To ensure patient safety, be firm and polite when you need to refuse unreasonable requests from patients | 4.6 | 68.8% | 13.4% |
| F7 Protecting patient privacy                                                                               | 4.9 | 87.5% | 7.0%  |
| F8 Empathy for patients                                                                                     | 4.7 | 68.8% | 10.2% |
| F9 Can use appropriate methods to help patients increase their confidence in overcoming the disease         | 4.6 | 62.5% | 10.8% |
| Domian G: organizational effectiveness                                                                      | 4.5 | 56.3% | 14.1% |
| G1 Ability to respond effectively to emergencies                                                            | 4.7 | 68.8% | 10.2% |
| G2 Proper time control and overall efficiency                                                               | 4.6 | 68.8% | 13.4% |
| G3 Focus on prioritization in nursing behaviors                                                             | 4.8 | 81.3% | 8.4%  |

|                                                          |     |       |       |
|----------------------------------------------------------|-----|-------|-------|
| G4 Efficient use of resources to provide optimal service | 4.7 | 75.0% | 12.8% |
| G5 Appropriate and flexible assessment processing        | 4.3 | 50.0% | 21.9% |
| G6 High patient satisfaction                             | 4.4 | 50.0% | 14.2% |
